# Supplementary material for: Multiple Metabolic Engineering Strategies to Improve Shikimate Titer in Escherichia coli
Source: MDPI journal article supplement (doi:10.3390/metabo13060747), 2023-06-12
Supplement: s1 [file s1]

# Multiple Metabolic Engineering Strategies to Improve Shikimate Titer in *Escherichia coli*

**Taidong Bo<sup>1</sup>, Chen Wu<sup>1</sup>, Zeting Wang<sup>1</sup>, Hao Jiang<sup>1</sup>, Feiao Wang<sup>1</sup>, Ning Chen<sup>1,2,3</sup>, Yanjun Li<sup>1,2,3,\*</sup>**

<sup>1</sup> College of Biotechnology, Tianjin University of Science and Technology, Tianjin, 300457, China

<sup>2</sup> Key Laboratory of Industrial Fermentation Microbiology, Ministry of Education, Tianjin University of Science and Technology, Tianjin, 300457, China

<sup>3</sup> National and Local United Engineering Lab of Metabolic Control Fermentation Technology, Tianjin University of Science and Technology, Tianjin 300457, China

\* Correspondence: yjli@tust.edu.cn

**Figure. S1** The HPLC chromatograph of shikimate and DHS

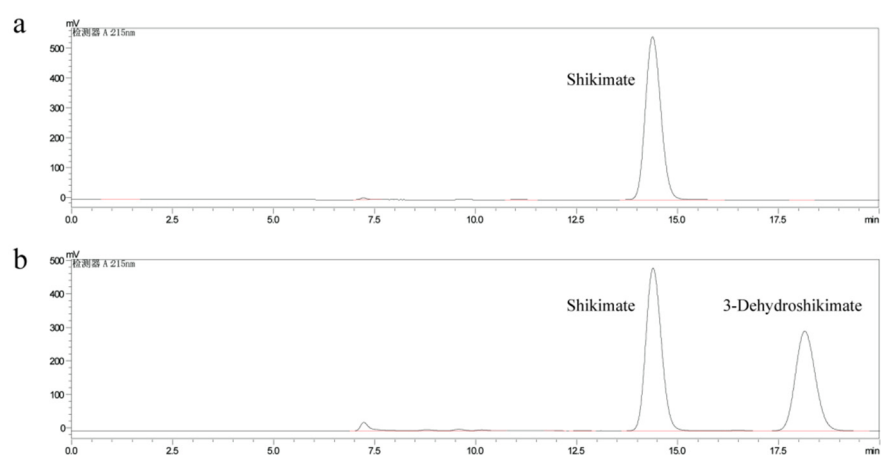

a: standard sample of shikimate, b: fermentation broth containing shikimate and DHS

**Table S1.** Strains and plasmids used in this study.

| Strains/Plasmids            | Characteristics                                                                                                                                                                                        | Source     |
|-----------------------------|--------------------------------------------------------------------------------------------------------------------------------------------------------------------------------------------------------|------------|
| <b>Strains</b>              |                                                                                                                                                                                                        |            |
| <i>E. coli</i> DH5 $\alpha$ | F <sup>-</sup> $\phi$ 80 <i>lacZ</i> $\Delta$ M15 $\Delta$ ( <i>lacZYA-argF</i> )U169 <i>recA1 endA1</i><br><i>hsdR17</i> ( $r_k^-$ , $m_k^+$ ) <i>deoR supE44</i> $\lambda$ <i>thi-1 gyrA96 relA1</i> | Lab stock  |
| dSA00                       | <i>E. coli</i> W3110 $\Delta$ <i>lacI</i>                                                                                                                                                              | Lab stock  |
| dSA01-1                     | dSA00 <i>ptsG::galP</i>                                                                                                                                                                                | This study |
| dSA01-2                     | dSA00 <i>ptsG::iolT1</i> ( <i>Cgl1081</i> )                                                                                                                                                            | This study |
| dSA02-1                     | dSA01-1 <i>rph::P<sub>trc</sub>-glk</i> ( <i>E. coli</i> )                                                                                                                                             | This study |
| dSA02-2                     | dSA01-2 <i>rph::P<sub>trc</sub>-glk</i> ( <i>C. glutamicum</i> )                                                                                                                                       | This study |
| dSA03                       | dSA02-1 <i>yeeP::P<sub>trc</sub>-tktA</i>                                                                                                                                                              | This study |
| dSA04                       | dSA03 <i>aroL::P<sub>trc</sub>-aroB</i> , $\Delta$ <i>ydiB</i> , $\Delta$ <i>shiA</i> , $\Delta$ <i>ydiN</i>                                                                                           | This study |
| dSA05-1                     | dSA04 <i>tyrR::P<sub>trc</sub>-aroG</i> <sup>D146N</sup>                                                                                                                                               | This study |
| dSA05-2                     | dSA04 <i>tyrR::P<sub>trc</sub>-aroG</i> <sup>S180F</sup>                                                                                                                                               | This study |
| dSA05-3                     | dSA04 <i>tyrR::P<sub>trc</sub>-aroG</i> <sup>S211F</sup>                                                                                                                                               | This study |
| dSA06-1                     | dSA05-3 <i>yghX::P<sub>trc</sub>-aroD</i>                                                                                                                                                              | This study |
| dSA06-2                     | dSA06-1 <i>ygaY::P<sub>trc</sub>-aroE</i>                                                                                                                                                              | This study |
| dSA06-3                     | dSA05-3 <i>yghX::P<sub>trc</sub>-aroD-aroE</i>                                                                                                                                                         | This study |
| dSA07-1                     | dSA06-2 $\Delta$ <i>aroK</i>                                                                                                                                                                           | This study |
| dSA07-2                     | dSA06-2 <i>aroK::aroK</i> <sup>M13A</sup>                                                                                                                                                              | This study |
| dSA07-3                     | dSA06-2 <i>aroK::aroK</i> <sup>V47I</sup>                                                                                                                                                              | This study |
| dSA07-4                     | dSA06-2 <i>aroK::aroK</i> <sup>F51W</sup>                                                                                                                                                              | This study |
| dSA07-5                     | dSA06-2 <i>aroK::aroK</i> <sup>R60K</sup>                                                                                                                                                              | This study |
| dSA07-6                     | dSA06-2 <i>aroK::aroK</i> <sup>K118A</sup>                                                                                                                                                             | This study |
| dSA07-7                     | dSA06-2 <i>aroK::aroK</i> <sup>R140A</sup>                                                                                                                                                             | This study |
| dSA08                       | dSA07-2 <i>ycgH::P<sub>bioFAB104</sub>-esaR</i> <sup>I70V</sup>                                                                                                                                        | This study |
| dSA09-1                     | dSA08 <i>mbhA::P<sub>L19</sub>-esaI</i> [1]/ pSTV28- <i>mCherry-egfp</i>                                                                                                                               | This study |
| dSA09-2                     | dSA08 <i>mbhA::P<sub>L24</sub>-esaI</i> [1]/ pSTV28- <i>mCherry-egfp</i>                                                                                                                               | This study |
| dSA09-3                     | dSA08 <i>mbhA::P<sub>L31</sub>-esaI</i> [1]/ pSTV28- <i>mCherry-egfp</i>                                                                                                                               | This study |
| dSA10                       | dSA09-2 $\Delta$ <i>pykA</i> , <i>P<sub>pykF</sub>::P<sub>esaS</sub></i> ,<br><i>P<sub>trc</sub>-aroG</i> <sup>S211F</sup> :: <i>P<sub>esaR-C</sub>-aroG</i> <sup>S211F</sup>                          | This study |
| <b>Plasmids</b>             |                                                                                                                                                                                                        |            |
| pRedCas9                    | Spe <sup>r</sup> , Cas9 and $\lambda$ Red recombinase expression vector                                                                                                                                | [15]       |
| pGRB                        | Amp <sup>r</sup> , gRNA expression vector                                                                                                                                                              | [15]       |
| pSTV28                      | Cm <sup>r</sup> , p15A ori, medium copy number                                                                                                                                                         | Lab stock  |
| pSTV28- <i>mCherry-egfp</i> | Cm <sup>r</sup> , <i>P<sub>esaR-C</sub>-mCherry</i> and <i>P<sub>esaS</sub>-egfp</i> expressed in pSTV28                                                                                               | This study |

**Table S2.** Primers used in this study.

| Primers         | Sequences (5'-3')                                                                           |
|-----------------|---------------------------------------------------------------------------------------------|
| <i>ptsG</i> -US | ATCGGTTACTGGTGGAAACTGAC                                                                     |
| <i>ptsG</i> -UA | AATTGAGAGTGCTCCTGAGTATGG                                                                    |
| <i>ptsG</i> -DS | TAGTGGTTGCTGGTTCTGGTGTTT                                                                    |
| <i>ptsG</i> -DA | GCAGAGGATAACGAAGGAAACGC                                                                     |
| <i>rph</i> -US  | GTTGATTTCCCCTTCGTCCTCT                                                                      |
| <i>rph</i> -UA  | TGTGTGAAATTGTTATCCGCTCACAATTCCACACATTATACGAGCCGG<br>ATGATTAATTGTCAAAAACAAATGTGGCTGCGCAT     |
| <i>rph</i> -DS  | AAAGACTGGGCCTTTCGTTTTATCTGTTGTTTGTCTGGTGAACGCTCTC<br>CTGAGTAGGACAAATGGTTTTCGATCTGGAATACGT   |
| <i>rph</i> -DA  | TCAGCGTAAACTCGCCAAACT                                                                       |
| <i>yeep</i> -US | ACCAAAAAGGGTGAATCTCCG                                                                       |
| <i>yeep</i> -UA | TGTGTGAAATTGTTATCCGCTCACAATTCCACACATTATACGAGCCGG<br>ATGATTAATTGTCAATGTCTGCCAGAAATACTCATCCAC |
| <i>yeep</i> -DS | AAAGACTGGGCCTTTCGTTTTATCTGTTGTTTGTCTGGTGAACGCTCTC<br>CTGAGTAGGACAAATTTCTGAACCTGTCGTGACTGATG |
| <i>yeep</i> -DA | GTGGTTCTGTTGTTCCCTGAATG                                                                     |
| <i>aroL</i> -US | GTTGCCGATAACGAAATTGTCC                                                                      |
| <i>aroL</i> -UA | TGTGTGAAATTGTTATCCGCTCACAATTCCACACATTATACGAGCCGG<br>ATGATTAATTGTCAAAGGTTGTGTCATCGTGGGTTTT   |
| <i>aroL</i> -DS | AAAGACTGGGCCTTTCGTTTTATCTGTTGTTTGTCTGGTGAACGCTCTC<br>CTGAGTAGGACAAATCGGGATCGTGGTTTATTTGTGT  |
| <i>aroL</i> -DA | AAATGTGACGCAGATCCCTTGT                                                                      |
| <i>ydiB</i> -US | CAATGCCGGAGCCTTTGTTAT                                                                       |
| <i>ydiB</i> -UA | CATTCTCAAGGGGTTTCATACCCATTTCTGGGCGATAAACTGTGG                                               |
| <i>ydiB</i> -DS | CCACAGTTTATCGCCCGAAATGGGTATGAAACCCCTTGAGAATG                                                |
| <i>ydiB</i> -DA | GGTTTTTCTGGCATGGTCTCAC                                                                      |
| <i>ydiN</i> -US | TTGCTCTGTTTACCGTCTGCC                                                                       |
| <i>ydiN</i> -UA | GCCAAACCGCACATCATTTTCCCCAACAACGTGTGGGTAGTTGAGTTC<br>CCTGGGTACATGGCATAA                      |
| <i>ydiN</i> -DS | TTATGCCATGTACCCAGGGAACCTCAACTACCCACAGTTGTTGGGGAA<br>AATGATGTGCGGTTTGGC                      |
| <i>ydiN</i> -DA | AAAGTCCGCTTCACGATAGGC                                                                       |
| <i>shiA</i> -US | GCCATAGCATCGCCAATCTGA                                                                       |
| <i>shiA</i> -UA | CCGTACTCTGCGGTGATCCAGCCTTATGGCTGATTAGCGGCAAC                                                |
| <i>shiA</i> -DS | GTTGCCGCTAATCAGCCATAAGGCTGGATCACCGCAGAGTACGGTT<br>GGTTTGCTGGTAGGTGGAT                       |
| <i>shiA</i> -DA | CAGGCATCCAGCCAGCAAATA                                                                       |
| <i>tyrR</i> -US | AGCCGTTTGCGTCTGTTTAAG                                                                       |
| <i>tyrR</i> -UA | GGGCACTTCGGCGTAAAGAT                                                                        |
| <i>tyrR</i> -DS | AAAGACTGGGCCTTTCGTTTTATCTGTTGTTTGTCTGGTGAACGCTCTC<br>CTGAGTAGGACAAATTGGTGATGTTGCGATCAACGAT  |
| <i>tyrR</i> -DA | TGCACCAGTTCGACCAGATTC                                                                       |

---

|                             |                                                                                                 |
|-----------------------------|-------------------------------------------------------------------------------------------------|
| <i>yghX</i> -US             | TTGGTAGAGATAATCAGTTCATCGC                                                                       |
| <i>yghX</i> -UA             | TGTGTGAAATTGTTATCCGCTCACAATTCCACACATTATACGAGCCGG<br>ATGATTAATTGTCAAAGTAATCCAGCAACTCTTGTGGG      |
| <i>yghX</i> -DS             | AAAGACTGGGCCTTTCGTTTTATCTGTTGTTTGTCTGGTGAACGCTCTC<br>CTGAGTAGGACAAATTAGGTTTATCTCTTACGGGATTACGTC |
| <i>yghX</i> -DA             | AACGAAGGGAAGAAGCATTAGTGTA                                                                       |
| <i>aroK</i> -US             | CTGGCGATTGATAAGCAGGAG                                                                           |
| <i>aroK</i> -UA             | CCGTACTCTGCGGTGATCCAGCCTAAATCACCCATCCCTCTGCA<br>TGCAGAGGGATGGGTGATTTAGGCTGGATCACCGCAGAGTACGGAT  |
| <i>aroK</i> -DS             | GAACGCAATCCGCTGTATG                                                                             |
| <i>aroK</i> -DA             | GGACTTGAATGAAACGGACACC                                                                          |
| <i>pykA</i> -US             | CCCACGATGCGATGAATAAGT                                                                           |
| <i>pykA</i> -UA             | ACCTTTATCGCGCAGCAGATTAGAATGAAATAACGCCGCGATG                                                     |
| <i>pykA</i> -DS             | CATCGCGCGTTATTTCAATTCTAATCTGCTGCGCGATAAAGGT                                                     |
| <i>pykA</i> -DA             | CGTTTGATGAAAGTGTGCCGT                                                                           |
| <i>ycgH</i> -US             | AACAGGCACTAAAGCCCCAT                                                                            |
| <i>ycgH</i> -UA             | TAAGTATCCTATAGGTTAGACTTTATGTCTGAGTTGTGCCGCTGACGA<br>GTTTA                                       |
| <i>ycgH</i> -DS             | AAAGACTGGGCCTTTCGTTTTATCTGTTGTTTGTCTGGTGAACGCTCTC<br>CTGAGTAGGACAAATTGGCTACAATGACACCGCAGT       |
| <i>ycgH</i> -DA             | TGGTGCTGTCACTGGCGTTCT                                                                           |
| <i>pykF</i> -US             | AACTGGACCGCAACTGAAGCA                                                                           |
| <i>pykF</i> -UA             | GGATACGCTTACACTGTTGTGAGCTGGTGCCGAAGTTGTCAGTGT<br>AATTCATTAAAGAGGAGAAAGGATCCATGAAAAAGACCAAAATTGT |
| <i>pykF</i> -DS             | TTGC                                                                                            |
| <i>pykF</i> -DA             | CCAGGTCACCGTTGTTTCAGCA                                                                          |
| <i>ygaY</i> -US             | CCGATACCAAAGTCCGAATG                                                                            |
| <i>ygaY</i> -UA             | TGTGTGAAATTGTTATCCGCTCACAATTCCACACATTATACGAGCCGG<br>ATGATTAATTGTCAAGCAATGGCTGGGCGTAATAGT        |
| <i>ygaY</i> -DS             | AAAGACTGGGCCTTTCGTTTTATCTGTTGTTTGTCTGGTGAACGCTCTC<br>CTGAGTAGGACAAATTACTGGTCTGGTGGCGAGGT        |
| <i>ygaY</i> -DA             | GCAGACGCTGAATAATACGGC                                                                           |
| <i>mbhA</i> -US             | GCCAGCACGAACATAATCCC                                                                            |
| <i>mbhA</i> -UA             | TCCACACATTATACGAGCCGATGATTAAGAGGCAACACGGTGGCAGG<br>TTTTGG                                       |
| <i>mbhA</i> -DS             | AAAGACTGGGCCTTTCGTTTTATCTGTTGTTTGTCTGGTGAACGCTCTC<br>CTGAGTAGGACAAATGACCAAAAGTGCGTCCGATAC       |
| <i>mbhA</i> -DA             | CGGCGTAATCACAACTGGC                                                                             |
| <i>galP</i> -S              | GGAGCACTCTCAATTATGCCTGACGCTAAAAAACAGG                                                           |
| <i>galP</i> -A              | AACCAGCAACCACTATTAATCGTGAGCGCCTATTTCG                                                           |
| <i>iolTl</i> -S             | GGAGCACTCTCAATTATGGCTAGTACCTTCATTACAGG                                                          |
| <i>iolTl</i> -A             | AACCAGCAACCACTATTAGTGACCTTTCCTTTTCGG                                                            |
| <i>glk<sub>Eco</sub></i> -S | CGTATAATGTGTGGAATTGTGAGCGGATAACAATTTACACAAGGAG<br>ACCAGTTTATGACAAAGTATGCATTAGTCGGTG             |

---

---

|                            |                                                                                                |
|----------------------------|------------------------------------------------------------------------------------------------|
| <i>glk<sub>Eco</sub>-A</i> | CACCGACAAACAACAGATAAAACGAAAGGCCCAGTCTTTTCGACTGA<br>GCCTTTCGTTTTATTTGTTACAGAATGTGACCTAAGGTCTGGC |
| <i>glk<sub>Cgl</sub>-S</i> | CGTATAATGTGTGGAATTGTGAGCGGATAACAATTCACACAAGGAG<br>ACCAGTTTATGCCACAAAAACCGGCC                   |
| <i>glk<sub>Cgl</sub>-A</i> | CACCGACAAACAACAGATAAAACGAAAGGCCCAGTCTTTTCGACTGA<br>GCCTTTCGTTTTATTTGCTAGTTGGCTTCCACTACAGAGCG   |
| <i>tkl-S</i>               | CGTATAATGTGTGGAATTGTGAGCGGATAACAATTCACACAAGGAG<br>ACCAGTTTATGTCTCACGTAAAGAGCTTGC               |
| <i>tkl-A</i>               | CACCGACAAACAACAGATAAAACGAAAGGCCCAGTCTTTTCGACTGA<br>GCCTTTCGTTTTATTTGTTACAGCAGTTCTTTTGCTTTCGC   |
| <i>aroB-S</i>              | CGTATAATGTGTGGAATTGTGAGCGGATAACAATTCACACAAGGAG<br>ACCAGTTTATGGAGAGGATTGTCGTTACTCTCG            |
| <i>aroB-A</i>              | CACCGACAAACAACAGATAAAACGAAAGGCCCAGTCTTTTCGACTGA<br>GCCTTTCGTTTTATTTGTTACGCTGATTGACAATCGGC      |
| <i>aroD-S</i>              | CGTATAATGTGTGGAATTGTGAGCGGATAACAATTCACACAAGGA<br>GACCAGTTTATGAAAACCGTAACTGTAAAAGATCTCG         |
| <i>aroD-A</i>              | CACCGACAAACAACAGATAAAACGAAAGGCCCAGTCTTTTCGACTGA<br>GCCTTTCGTTTTATTTGTTATGCCTGGTGTAATAAGTTAATAC |
| <i>aroE-S</i>              | CGTATAATGTGTGGAATTGTGAGCGGATAACAATTCACACAAGGAG<br>ACCAGTTTATGGAACCTATGCTGTTTTTGG               |
| <i>aroE-A</i>              | CACCGACAAACAACAGATAAAACGAAAGGCCCAGTCTTTTCGACTGA<br>GCCTTTCGTTTTATTTGTCACGCGGACAATTCCTCC        |
| <i>aroG-S</i>              | CGTATAATGTGTGGAATTGTGAGCGGATAACAATTCACACAAGGA<br>GACCAGTTTATGAATTATCAGAACGACGATTTACG           |
| <i>aroG-1</i> (D146N)      | TGGGGTGATCATATTGAGAACTCACCTGC                                                                  |
| <i>aroG-2</i> (D146N)      | GCAGGTGAGTTTCTCAATATGATCACCCCA                                                                 |
| <i>aroG-3</i> (S180F)      | GAAGCCGACCGGACAAAAAAGCCCTGATGC                                                                 |
| <i>aroG-4</i> (S180F)      | GCATCAGGGCTTTTTTGTCCGGTCGGCTTC                                                                 |
| <i>aroG-5</i> (S211F)      | TTACGAACAGGAAGCAGTGCG                                                                          |
| <i>aroG-6</i> (S211F)      | CGCACTGCTTCCTGTTCGTAA                                                                          |
| <i>aroG-A</i>              | CACCGACAAACAACAGATAAAACGAAAGGCCCAGTCTTTTCGACTGA<br>GCCTTTCGTTTTATTTGTTACCCGCGACGCGCTTT         |
| <i>aroK-1</i> (M13A)       | GCTTTTTCCGGCACCTGCAGGCCCAACCAGAAA                                                              |
| <i>aroK-2</i> (M13A)       | TTTCTGGTTGGGCCTGCAGGTGCCGGAAGAAAGC                                                             |
| <i>aroK-3</i> (V47I)       | ATCGAAAACCCAGCCAATATCAGCTCCGGTTTCG                                                             |
| <i>aroK-4</i> (V47I)       | CGAACCGGAGCTGATATTGGCTGGGTTTTTCGAT                                                             |
| <i>aroK-5</i> (F51W)       | TTCGCCTTCTAAATCCCAAACCCAGCCCACATC                                                              |
| <i>aroK-6</i> (F51W)       | GATGTGGGCTGGGTTTGGGATTTAGAAGGCGAA                                                              |
| <i>aroK-7</i> (R60K)       | CTTTTCTTCGCGATCTTTGAAGCCTTCTTCGCC                                                              |
| <i>aroK-8</i> (R60K)       | GGCGAAGAAGGCTTCAAAGATCGCGAAGAAAAG                                                              |
| <i>aroK-9</i> (K118A)      | CAGCAACGGGCGTTTTGCATCACGCTGCGTGCG                                                              |
| <i>aroK-10</i> (K118A)     | CGCACGCAGCGTGATGCAAAACGCCCGTTGCTG                                                              |
| <i>aroK-11</i> (R140A)     | TTCATACAGCGGATTTGCTTCATTGGCCAACG                                                               |
| <i>aroK-12</i> (R140A)     | CGTTGGCCAATGAAGCAAATCCGCTGTATGAA                                                               |

---

---

|                        |                                                                                                                                              |
|------------------------|----------------------------------------------------------------------------------------------------------------------------------------------|
| <i>esaR</i> -US        | TCGACATAAAGTCTAACCTATAGGATACTTACAGCCATCAATTCATT<br>AAAGAGGAGAAAGGATCCATGTTTTCTTTTTTCCTTGAAAAT                                                |
| <i>esaR</i> -UD (I70V) | TAAAGGCCGTGAGAACAACCGGATCGGTCAG                                                                                                              |
| <i>esaR</i> -DS (I70V) | CTGACCGATCCGGTTGTTCTCACGGCCTTTA                                                                                                              |
| <i>esaR</i> -DA        | CACCGACAAACAACAGATAAAACGAAAGGCCCAGTCTTTCGACTGA<br>GCCTTTCGTTTTATTTGTTACCTGGCCGCTGACGCTG                                                      |
| <i>esaI</i> -S         | ATGCTTGAAGTGTGACGTCAGT                                                                                                                       |
| <i>esaI</i> -A         | CACCGACAAACAACAGATAAAACGAAAGGCCCAGTCTTTCGACTGA<br>GCCTTTCGTTTTATTTGTTAGACCGGCAGCGTCAGC                                                       |
| pGRB-S                 | TTTtagagctagaaatagcaagttaa                                                                                                                   |
| pGRB-A                 | ATTATACCTAGGACTGAGC                                                                                                                          |
| pSTV28-S               | AAAGACTGGGCCTTTCGTTTTATCTGTTGTTTGTCGGTGAACGCTCTC<br>CTGAGTAGGACAAATCAACTTATATCGTATGGGGCTGAC                                                  |
| pSTV28-A               | CTATCGTCGCCGCACTTATGA                                                                                                                        |
| P <sub>esaS</sub> -S   | TCATAAGTGCGGCGACGATAGGCAGATTGAGTAACCGTGAATGTT                                                                                                |
| P <sub>esaS</sub> -A   | CCTCGCCCTTGCTCACCATGGATCCTTTCTCCTCTTTAATGAATT                                                                                                |
| P <sub>esaR-C</sub> -S | AATTCATTAAAGAGGAGAAATGGTGAGCAAGGGCGAGG                                                                                                       |
| P <sub>esaR-C</sub> -A | GGATACGCTTACACTGTTGTGAGCTTACTTGTACAGCTCGTCCATGCC<br>GGCATGGACGAGCTGTACAAGTAAGCTCACAACAGTGTAAGCGTAT<br>CC                                     |
| <i>mCherry</i> -S      |                                                                                                                                              |
| <i>mCherry</i> -A      | CCTCGCCCTTGCTCACCATGGATCCTTTCTCCTCTTTAATGAATT                                                                                                |
| <i>egfp</i> -S         | AATTCATTAAAGAGGAGAAAGGATCCATGGTGAGCAAGGGCGAGG<br>CACCGACAAACAACAGATAAAACGAAAGGCCCAGTCTTTCGACTGA<br>GCCTTTCGTTTTATTTGTTACTTGTACAGCTCGTCCATGCC |
| <i>egfp</i> -A         |                                                                                                                                              |

---

**Table S3.** The gRNA targeting sequences used in this study.

| <b>gRNA</b>       | <b>Sequences (5'-3')</b> |
|-------------------|--------------------------|
| pGRB- <i>ptsG</i> | TCTAAACACCTGGCGGATAC     |
| pGRB- <i>rph</i>  | GGCTGGATCACCGCAGAGTA     |
| pGRB- <i>yeep</i> | ACAGAATATTCGCGAAAAAA     |
| pGRB- <i>aroL</i> | TTGCCGATTCGCTTAACCGT     |
| pGRB- <i>ydiB</i> | GCCCTCAAAATGCGCGGAAC     |
| pGRB- <i>ydiN</i> | TCTCCGATAAGTTTGGTCGT     |
| pGRB- <i>shiA</i> | AATAGGTGCCCACCACCCAA     |
| pGRB- <i>tyrR</i> | CTCGATCTACTCGTGCTAAG     |
| pGRB- <i>yghX</i> | CCCACTTTGCCTGTCGCTTG     |
| pGRB- <i>aroK</i> | GCTTCCAGAACTTCACGCGG     |
| pGRB- <i>pykA</i> | ATCTGTTGCTGGGCCTAACG     |
| pGRB- <i>ycgH</i> | ATGCGTCTGAACGACCGTGC     |
| pGRB- <i>pykF</i> | CACCACCACTTTTCGTAATAC    |
| pGRB- <i>ygaY</i> | CTCAACTACCCACAGTTGTT     |
| pGRB- <i>mbhA</i> | TACCGGGCATACCGATGCGA     |



**Table S4.** Gene and promoter sequences involved in the QS circuits.

| Genes/<br>Promoters            | Sequence (5'-3')                                                                                                                                                                                                                                                                                                                                                                                                                                                                                                                                                                                                                                                                                                                                                                                                                                                                                                                                                                                                                                                                                                                                                                                               |
|--------------------------------|----------------------------------------------------------------------------------------------------------------------------------------------------------------------------------------------------------------------------------------------------------------------------------------------------------------------------------------------------------------------------------------------------------------------------------------------------------------------------------------------------------------------------------------------------------------------------------------------------------------------------------------------------------------------------------------------------------------------------------------------------------------------------------------------------------------------------------------------------------------------------------------------------------------------------------------------------------------------------------------------------------------------------------------------------------------------------------------------------------------------------------------------------------------------------------------------------------------|
| <i>esaR</i>                    | TCGACATAAAGTCTAACCTATAGGATACTTACAGCCATCAATTCATTAAAGAG<br>GAGAAAGGATCCATGTTTTCTTTTTCTTGAATCAAACAATAACGGATACG<br>CTTCAGACTTACATACAGAGAAAGTTATCTCCGCTGGGTAGTCCGGATTACGCTT<br>ACACTGTTGTGAGCAAAAAAATCCTTCAAATGTTCTGATTATTTCCAGTTATCC<br>TGACGAATGGATTAGGTTATACCGCGCTAACAACTTTCAGCTGACCGATCCGGTT<br>ATTCTCAGGCCTTTAAACGCACCTCGCCGTTTGCCTGGGTGAGAATATTACGC<br>TGATGTCCGACCTGCGGTTACCAAAAATTTCTCTTTATCCAAGCAATACAACAT<br>CGTTAACGGCTTTACCTATGTCTGCATGACCACATGAACAACCTTGCTCTGTTG<br>TCCGTGATCATTAAGGCAACGATCAGACTGCGCTGGAGCAACGCCTTGCTGCC<br>GAACAGGGCACGATGCAGATGCTGCTGATTGATTTAACGAGCAGATGTACCGC<br>CTGGCCGGTACCGAAGGCGAGCGAGCCCCGGCGTTAAATCAGAGCGCGGACAA<br>AACGATATTTTCTCGCGTGAAAATGAGGTGTTGTACTGGGCGAGTATGGGCAA<br>AACCTATGCTGAGATTGCCGCTATTACGGGCATTTCTGTGAGTACCGTGAAGTTT<br>CACATCAAGAATGTGGTCGTGAAACTGGGCGTCAGTAACGCCGACAGGCTAT<br>CAGACTGGGTGTAGAACTGGATCTTATCAGACCGGCAGCGTCAGCGGCCAGGT<br>AGTGA<br>ATGCTTGAACTGTTTGACGTCAGTTACGAAGAAGTCAAACCACCCGTTTACAG<br>AGAAGTTTATAAACTTCGCAAGAAAACATTTAGCGATCGTCTGGGATGGGAAG<br>TCATTTGCAGTCAGGGAATGGAGTCCGATGAATTTGATGGGCCCGGTACACGT<br>TATATTCTGGGAATCTGCGAAGGACAATTAAGTGTGCAGCGTACGTTTTACCAG<br>CCTCGATCGTCCCAACATGATCAGCACACTTTTCAGCACTGCTTCAGTGATGT<br><i>esaI</i> |
| <i>esaI</i>                    | CACCCTGCCCGCCTATGGTACCGAATCCAGCCGTTTTTTTGTGACAAAAGCCCCG<br>CGCAGGTGCGCTGTTAGGTGAGCACTACCCTATCAGCCAGGTCCTGTTTTTAGC<br>GATGGTGAAGTGGGCGCAAAATAATGCCTACGGCAATATCTATACGATTGTCA<br>GCCGCGCGATGTTGAAAATTCTCACTCGCTCTGGCTGGCAAATCAAAGTCATT<br>AAAGAGGCTTTCTGACCGAAAAGGAACGTATCTATTTGCTGACGCTGCCAGC<br>AGGTACAGGATGACAAGCAGCAACTCGGTGGTGATGTGGTGTCACGTACGGGCT<br>GTCCGCCCCGTGCGAGTCACTACCTGGCCGCTGACGCTGCCGGTCTGATAA<br>GCTCACAACAGTGTAAGCGTATCCGTTATTGTTTGATTTTCAAGGAAAAAGAA<br>AACATTACAGGCTCCATGCTGCTTTTACTTAACGTGGACTTAACCTGACATAT<br>AGTACAGGCAAGATGATACTTAAGAGTAACTTACAATGAATCATTACAGAGGTTA<br>CAATGGCTTCAGTTGTTTAGCCAATTCATTAAAGAGGAGAAAGGATCC<br>GCAGATTGAGTAACCGTGAATGTTTGTACAAATGTTTCAAAGATGTTACTATGAG<br>TGTCGCCGGCCAGCATCACTTTATATTTTGTGACGCTCTGGCCGGACGTTTTCCCTA<br>GTGTTGGCTGTTTTAGCGACCTGGCCGTACAGGTACAGGTTTTTTTTTACCCTAA<br><i>P<sub>esaR-C</sub></i> [59]                                                                                                                                                                                                                                                                                                                                             |
| <i>P<sub>esaR-C</sub></i> [59] | ACAAGTGAAGCCATTGTAACCTCTGAATGATTCATTGTAAGCCTGTACTATAGTG<br>CAGGTTGCCCTGTACTATAGTGCAGGTAAGTCCACGTAAAGTAAAGAACGAGCC<br>AATTCATTAAAGAGGAGAAAGGATCC<br>TTCACTTTTAAATCATCCGGCTCGTATAATGTGTGGAGGGCCCAAGTTCACTTAAA<br><i>P<sub>L19</sub></i> [52]                                                                                                                                                                                                                                                                                                                                                                                                                                                                                                                                                                                                                                                                                                                                                                                                                                                                                                                                                                     |
| <i>P<sub>L19</sub></i> [52]    | AAGGAGATCAACAATGAAAGCAATTTTCGTACTGAAACATCTTAATCATGCCTA<br>GGAAGTTTTCTA<br>TTGCCTCTTAATCATCGGCTCGTATAATGTGTGGAGGGCCCAAGTTCACTTAAAA<br><i>P<sub>L24</sub></i> [52]                                                                                                                                                                                                                                                                                                                                                                                                                                                                                                                                                                                                                                                                                                                                                                                                                                                                                                                                                                                                                                               |
| <i>P<sub>L24</sub></i> [52]    | AGGAGATCAACAATGAAAGCAATTTTCGTACTGAAACATCTTAATCATGCGAGG<br>GATGGTTTTCTA<br>TTGACATCAGGAAAATTTTCTGTATAATGTGTGGAGGGCCCAAGTTCACTTAA<br><i>P<sub>L31</sub></i> [52]                                                                                                                                                                                                                                                                                                                                                                                                                                                                                                                                                                                                                                                                                                                                                                                                                                                                                                                                                                                                                                                 |
| <i>P<sub>L31</sub></i> [52]    | AAAGGAGATCAACAATGAAAGCAATTTTCGTACTGAAACATCTTAATCATGCCT<br>AGGAAGTTTTCTA                                                                                                                                                                                                                                                                                                                                                                                                                                                                                                                                                                                                                                                                                                                                                                                                                                                                                                                                                                                                                                                                                                                                        |
